# Supplementary material for: The role of Cr3+ and Cr4+ in emission brightness enhancement and sensitivity improvement of NIR-emitting Nd3+/Er3+ ratiometric luminescent thermometers
Source: Royal Society of Chemistry journal article supplement (doi:10.1039/d1tc03046a), 2021-01-01
Supplement: d1tc03046a1.pdf [file d1tc03046a1.pdf]

## Supporting Information

### The role of Cr<sup>3+</sup> and Cr<sup>4+</sup> in emission brightness enhancement and sensitivity improvements of NIR-emitting Nd<sup>3+</sup>/Er<sup>3+</sup> ratiometric luminescence thermometers

W. Piotrowski<sup>1</sup>, L. Dalipi<sup>2</sup>, R. Szukiewicz<sup>3</sup>, B. Fond<sup>2</sup>, M. Dramicanin<sup>4</sup>, L.

Marciniak<sup>1\*</sup>

<sup>1</sup>Institute of Low Temperature and Structure Research, Polish Academy of Sciences, Okólna 2, 50-422 Wrocław, Poland

<sup>2</sup> Institute of Fluid Dynamics and Thermodynamics, Otto-von-Guericke University Magdeburg, 39106 Magdeburg, Germany

<sup>3</sup> Institute of Experimental Physics, Faculty of Physics and Astronomy, University of Wrocław, Wrocław 50-204, Poland

<sup>4</sup>Vinča Institute of Nuclear Sciences - National Institute of the Republic of Serbia, University of Belgrade, P.O. Box 522, Belgrade 11001, Serbia.

\* corresponding author: [lmarciniak@intibs.pl](mailto:lmarciniak@intibs.pl)

*KEYWORDS luminescent thermometry, triple-doped nanocrystals, sensitization by transition metals, host-sensitizer-emitter systems, lanthanide ions*

The integral intensities of the Nd<sup>3+</sup> and Er<sup>3+</sup> bands to calculate LIR values were fitted with Mott-Seitz equation (Eq. S1):

$$I = \frac{I_0}{C \cdot \exp\left(-\frac{W}{k \cdot T}\right) + 1} \quad (\text{Eq. S1})$$

where: I – the intensity in temperature T, I<sub>0</sub> – the intensity in the initial temperature, W - the activation energy, k – Boltzmann constant, C – the dimensionless constant

The average lifetime of the excited states were calculated with the equation Eq. S2:

$$\langle \tau \rangle = \frac{A_1 \tau_1^2 + A_2 \tau_2^2}{A_1 \tau_1 + A_2 \tau_2} \quad (\text{Eq. S2a})$$

where: τ<sub>1</sub>, τ<sub>2</sub> – the average time, which is in accordance with the relation τ = t·ln(2) and A<sub>1</sub>, A<sub>2</sub> – amplitude, which are the parameters of the doubleexponential function:

$$y = y_0 + A_1 \cdot \exp\left(-\frac{x}{t_1}\right) + A_2 \cdot \exp\left(-\frac{x}{t_2}\right) \quad (\text{Eq. S2b})$$

Temperature determination uncertainty was calculated using Eq. S6:

$$\delta T = \frac{1}{S_R} \cdot \frac{\delta LIR}{LIR} \quad (\text{Eq. S3a})$$

$S_R$  is the relative sensitivity and  $\delta LIR/LIR$  determines the uncertainty of the LIR determination, where  $\delta LIR/LIR$  was determined as follows:

$$\frac{\delta LIR}{LIR} = \sqrt{\left(\frac{\delta I_{Tb}}{I_{Tb}}\right)^2 + \left(\frac{\delta I_{Eu}}{I_{Eu}}\right)^2} \quad (\text{Eq. S3b})$$

Table S1. The Rietveld refinement parameters of XRD patterns for YAG:Nd<sup>3+</sup>, Er<sup>3+</sup>, Cr<sup>3+/4+</sup> powders

| Sample                                                            | Rexp    | Rprofile | weight R profile | D statistics | weight S-Statistics |
|-------------------------------------------------------------------|---------|----------|------------------|--------------|---------------------|
| YAG:1%Nd <sup>3+</sup> , 1%Er <sup>3+</sup>                       | 1.52919 | 1.96616  | 3.1929           | 1.33710      | 1.07269             |
| YAG:1%Nd <sup>3+</sup> , 1%Er <sup>3+</sup> , 1%Cr <sup>3+</sup>  | 1.55303 | 3.36102  | 4.73781          | 0.40631      | 0.25277             |
| YAG:1%Nd <sup>3+</sup> , 1%Er <sup>3+</sup> , 2%Cr <sup>3+</sup>  | 1.53677 | 2.51937  | 3.52202          | 0.70730      | 0.49693             |
| YAG:1%Nd <sup>3+</sup> , 1%Er <sup>3+</sup> , 5%Cr <sup>3+</sup>  | 1.52759 | 2.66131  | 3.75056          | 0.57502      | 0.39426             |
| YAG:1%Nd <sup>3+</sup> , 1%Er <sup>3+</sup> , 10%Cr <sup>3+</sup> | 1.55828 | 1.66312  | 2.39261          | 0.81267      | 0.73250             |

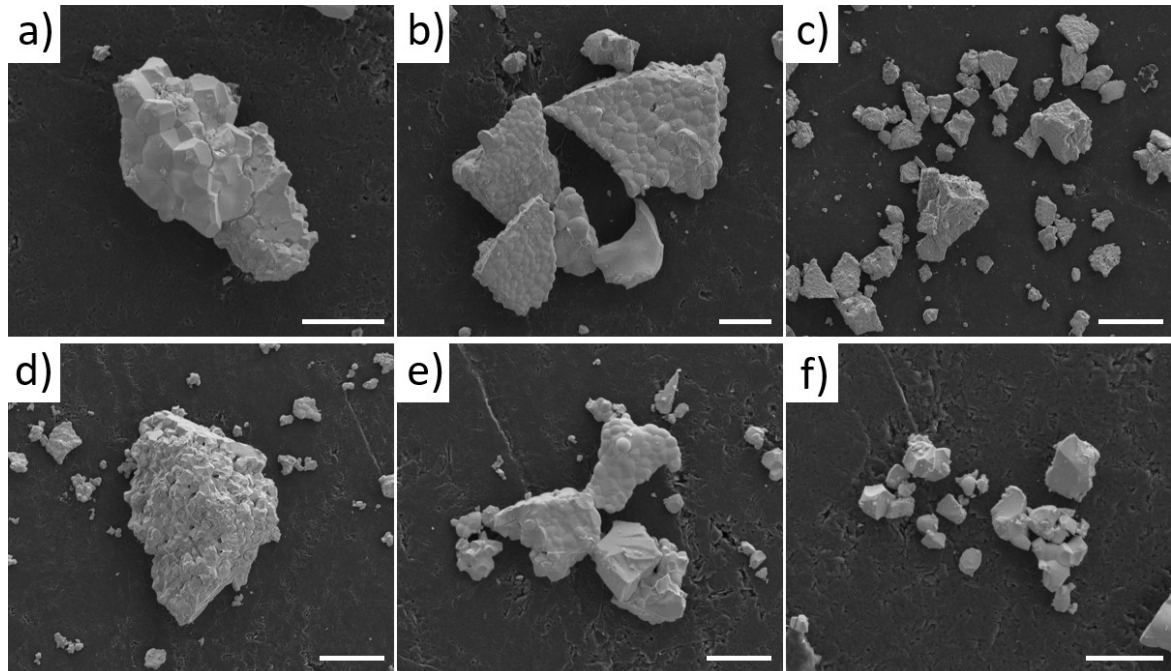

**Figure S1.** The representative SEM images of YAG:Nd<sup>3+</sup>, Er<sup>3+</sup> – scale bar: 4 μm (a), 5 μm (b), 20 μm (c) and YAG:Nd<sup>3+</sup>, Er<sup>3+</sup>, 10% Cr<sup>3+/4+</sup> – scale bar: 10 μm (d), 5 μm (e), 3 μm (f).

|                                                                      |         |         |         |         |         |
|----------------------------------------------------------------------|---------|---------|---------|---------|---------|
| YAG:1%Nd <sup>3+</sup> , 1%Er <sup>3+</sup> ,<br>20%Cr <sup>3+</sup> | 1.56894 | 1.82007 | 2.74488 | 0.78064 | 0.69035 |
|----------------------------------------------------------------------|---------|---------|---------|---------|---------|

Table S2. Atomic concentration of the surface of the analysed samples by EDS method.

| YAG:1%Nd <sup>3+</sup> , 1%Er <sup>3+</sup> , |                                 |       |                             |                                    |       |                             |
|-----------------------------------------------|---------------------------------|-------|-----------------------------|------------------------------------|-------|-----------------------------|
| Element                                       | Cr <sup>3+/4+</sup> -unco-doped |       |                             | doped with 10% Cr <sup>3+/4+</sup> |       |                             |
|                                               | at% (%)                         | +/-   | <i>r<sub>conc</sub></i> (%) | at% (%)                            | +/-   | <i>r<sub>conc</sub></i> (%) |
| Y                                             | 13.630                          | 0.166 |                             | 14.097                             | 0.284 |                             |
| Nd                                            | 0.180                           | 0.022 | 1.321                       | 0.187                              | 0.045 | 1.324                       |
| Er                                            | 0.163                           | 0.012 | 1.198                       | 0.180                              | 0.008 | 1.277                       |
| Al                                            | 25.877                          | 0.337 |                             | 24.773                             | 0.198 |                             |
| Cr                                            | -                               | -     |                             | 1.947                              | 0.123 | 7.858                       |
| O                                             | 60.147                          | 0.373 |                             | 58.817                             | 0.358 |                             |

*at%* - atomic percentage

*r<sub>conc</sub>* – the ratio of the dopant concentration in respect to the content of the element which it substitutes (Nd, Er substitutes Y sites, Cr substitutes Al sites)

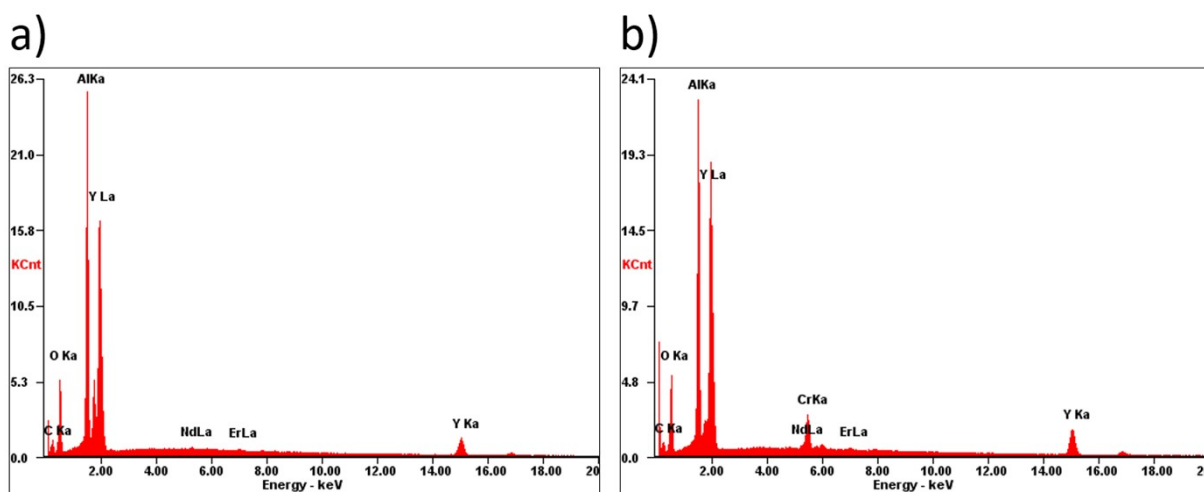

Figure S2. The representative EDS spectra for YAG:Nd<sup>3+</sup>, Er<sup>3+</sup> (a) and YAG:Nd<sup>3+</sup>, Er<sup>3+</sup>, 10% Cr<sup>3+/4+</sup> (b).

Table S3. Atomic concentration from the analyzed samples by XPS method.

The concentration of elements for the YAG:1% Nd<sup>3+</sup>, 1% Er<sup>3+</sup>, x% Cr<sup>3+/4+</sup> samples (%):

| Element | x = 1% | x = 5% | x = 10% | x = 20% |
|---------|--------|--------|---------|---------|
| Al      | 11.74  | 12.97  | 10.4    | 7.25    |
| Y       | 6.73   | 8.21   | 6.9     | 4.6     |
| C       | 40.25  | 32.23  | 43.28   | 50      |
| O       | 36.58  | 42.24  | 35.07   | 34.1    |
| N       | 4.54   | 4.17   | 3.96    | 3.48    |
| Cr      | 0      | 0.17   | 0.39    | 0.56    |

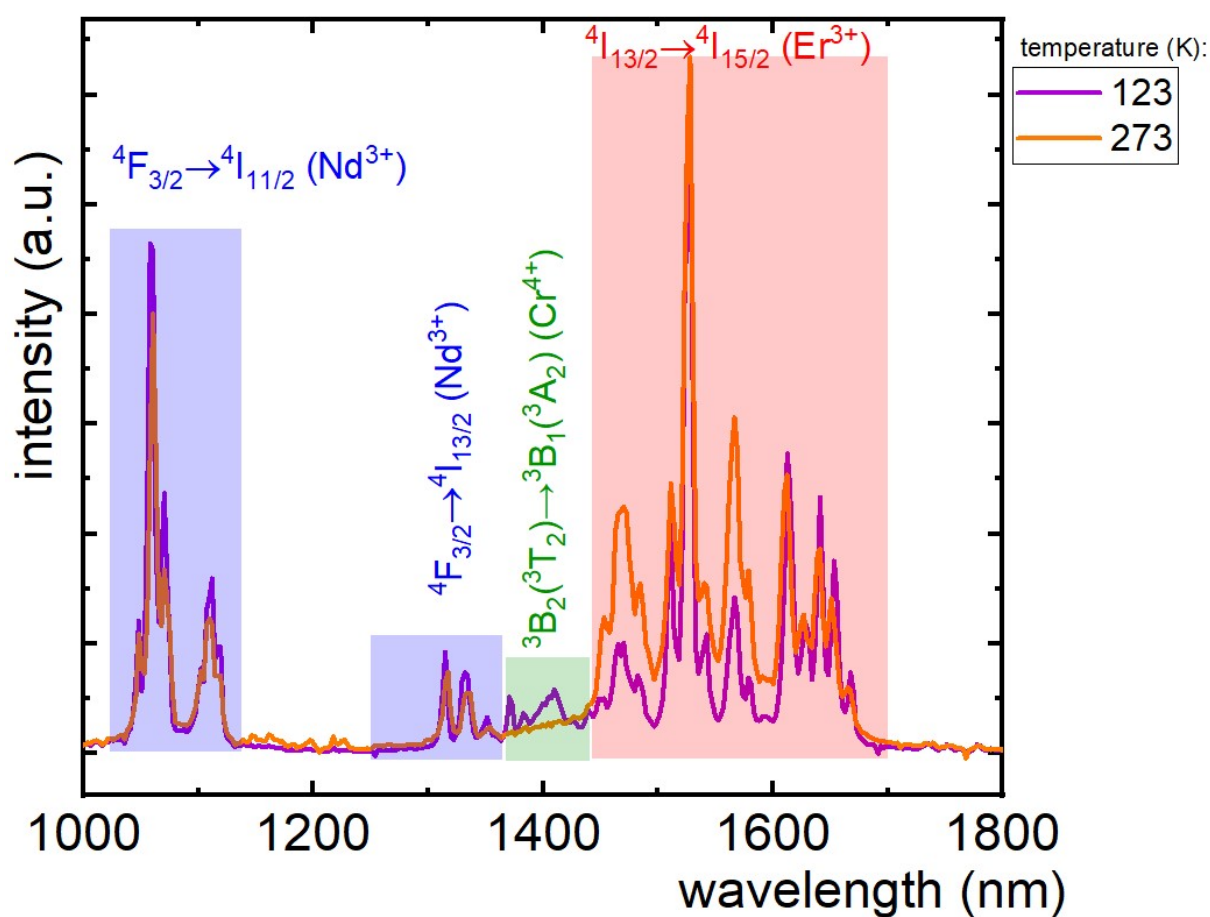

Figure S3. The emission spectra of YAG:1% Nd<sup>3+</sup>, 1% Er<sup>3+</sup>, 5% Cr<sup>3+/4+</sup> at 123 K and at 273K .

YAG:1% Nd<sup>3+</sup>, 1% Er<sup>3+</sup>, x% Cr<sup>3+/4+</sup>, x = 0 1 2 5 10 20

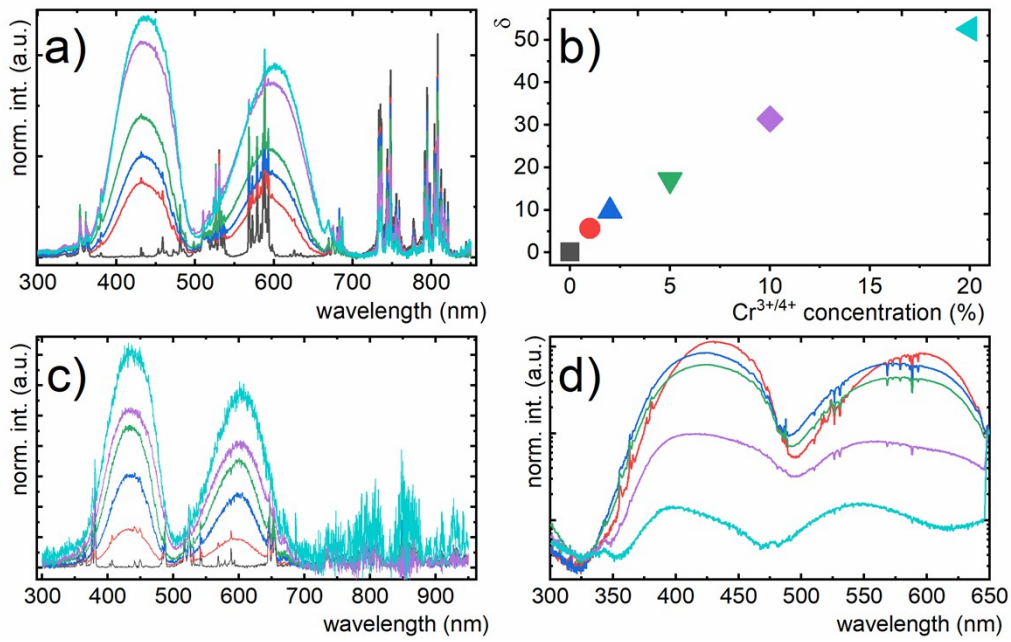

**Figure S4.** The influence of Cr<sup>3+/4+</sup> ions concentration on excitation spectra in YAG:1% Nd<sup>3+</sup>, 1% Er<sup>3+</sup>, x% Cr<sup>3+/4+</sup> for 1064 nm (a) and on the contribution parameter  $\delta$  (b), for 1530 nm (c) and for 445 nm (d).

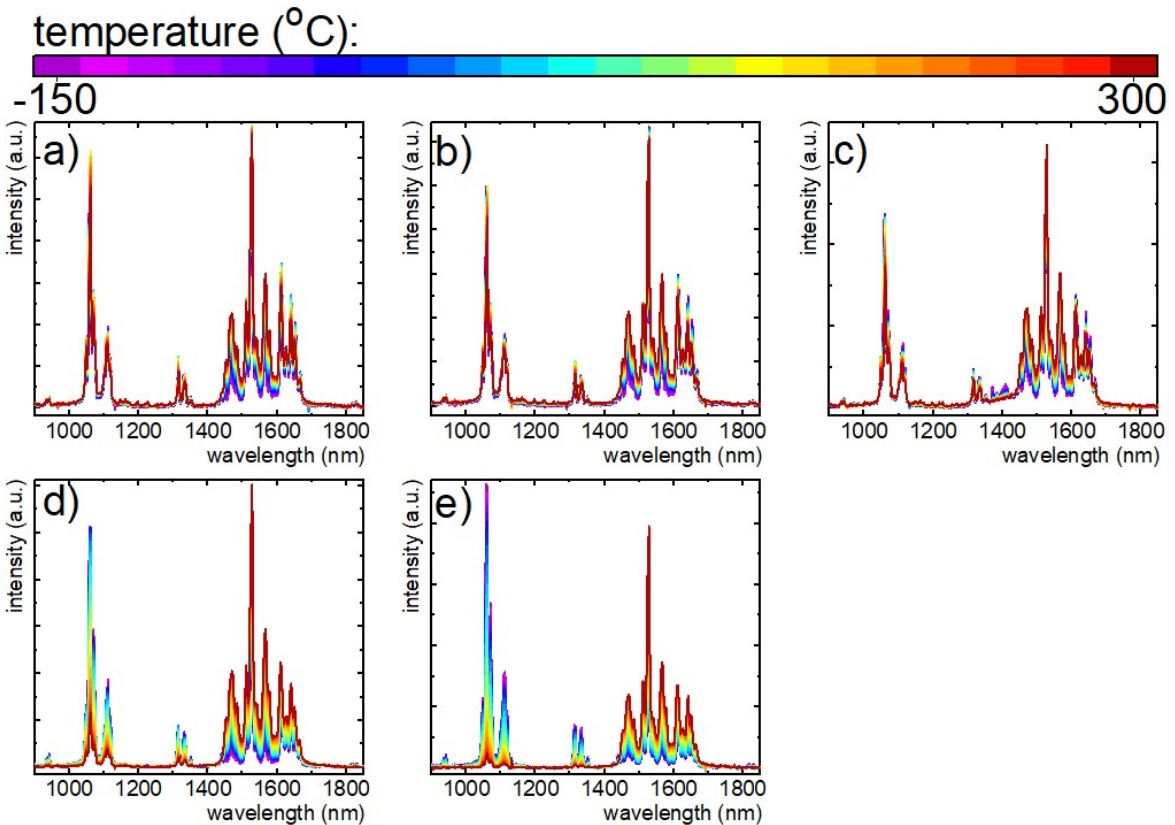

**Figure S5.** The thermal evolution of the NIR range of emission spectra of YAG:1% Nd<sup>3+</sup>, 1% Er<sup>3+</sup>, x% Cr<sup>3+/4+</sup> powders with  $\lambda_{exc} = 445$  nm, where x = 1 (a), 2 (b), 5 (c), 10 (d), 20 (e).

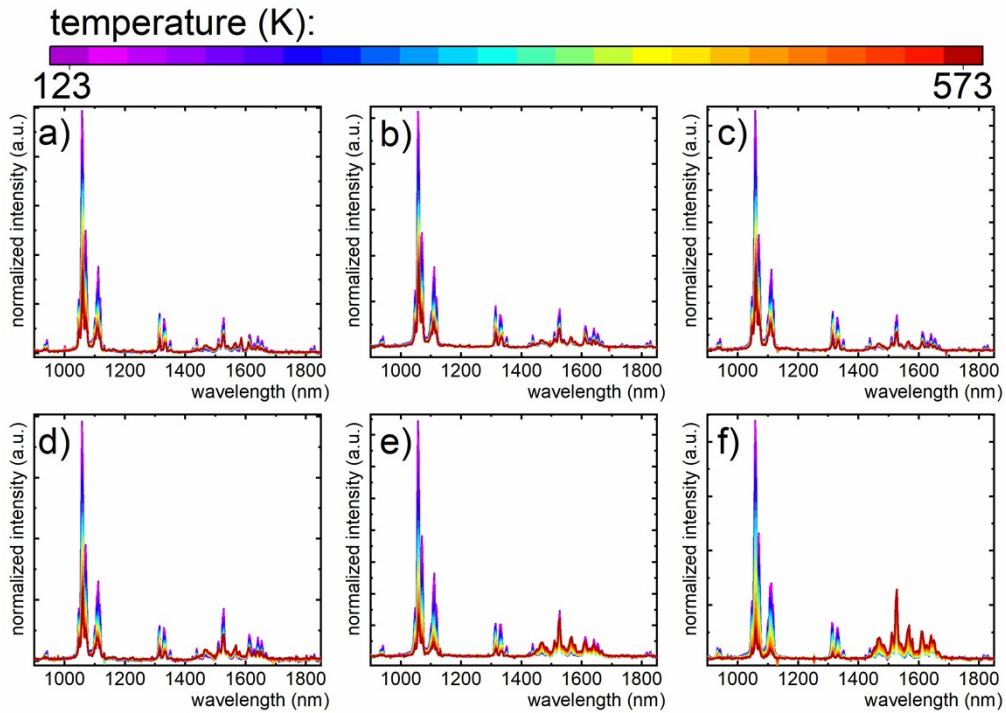

**Figure S6.** The thermal evolution of emission spectra of YAG:1% Nd<sup>3+</sup>, 1% Er<sup>3+</sup>, x% Cr<sup>3+/4+</sup> powders with  $\lambda_{\text{exc}} = 793$  nm, where x = 0 (a), 1 (b), 2 (c), 5 (d), 10 (e), 20 (f).

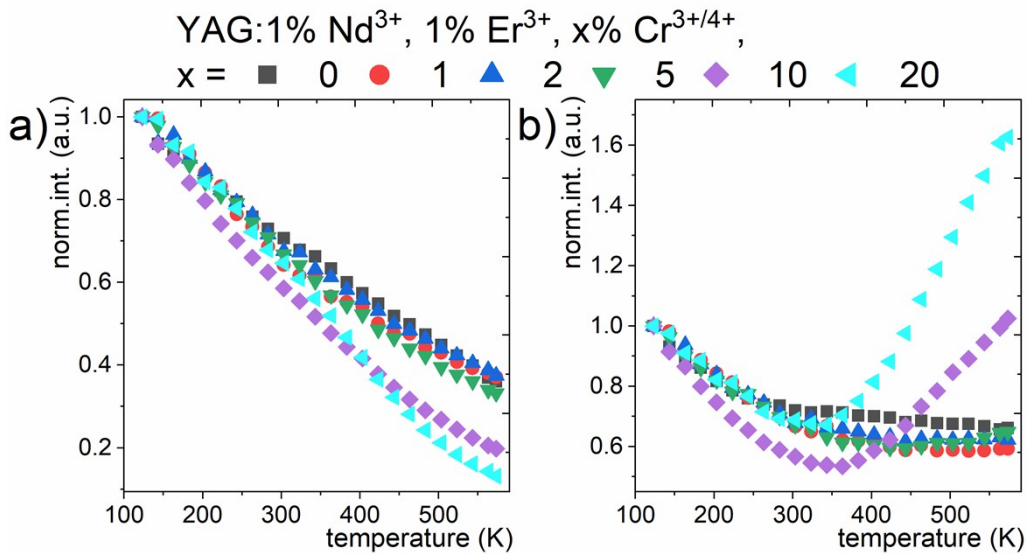

**Figure S7.** The thermal evolution of integral band intensities of  ${}^4F_{3/2} \rightarrow {}^4I_{11/2}$  transition of Nd<sup>3+</sup> ion (a) and  ${}^4I_{13/2} \rightarrow {}^4I_{15/2}$  electronic transition of Er<sup>3+</sup> ion (b) excited by  $\lambda_{\text{exc}} = 793$  nm.



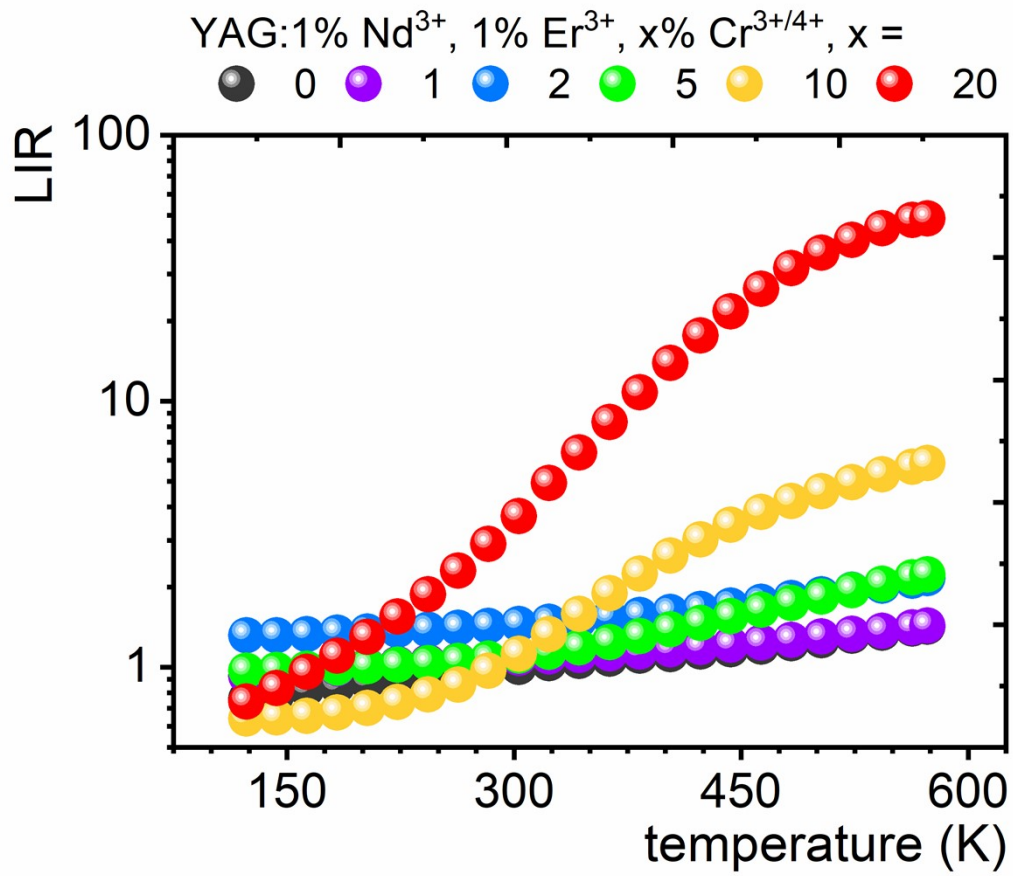

**Figure S8.** Thermal dependence of LIR calculated on the unnormalized data for different Cr<sup>3+</sup>/Cr<sup>4+</sup> dopant concentration



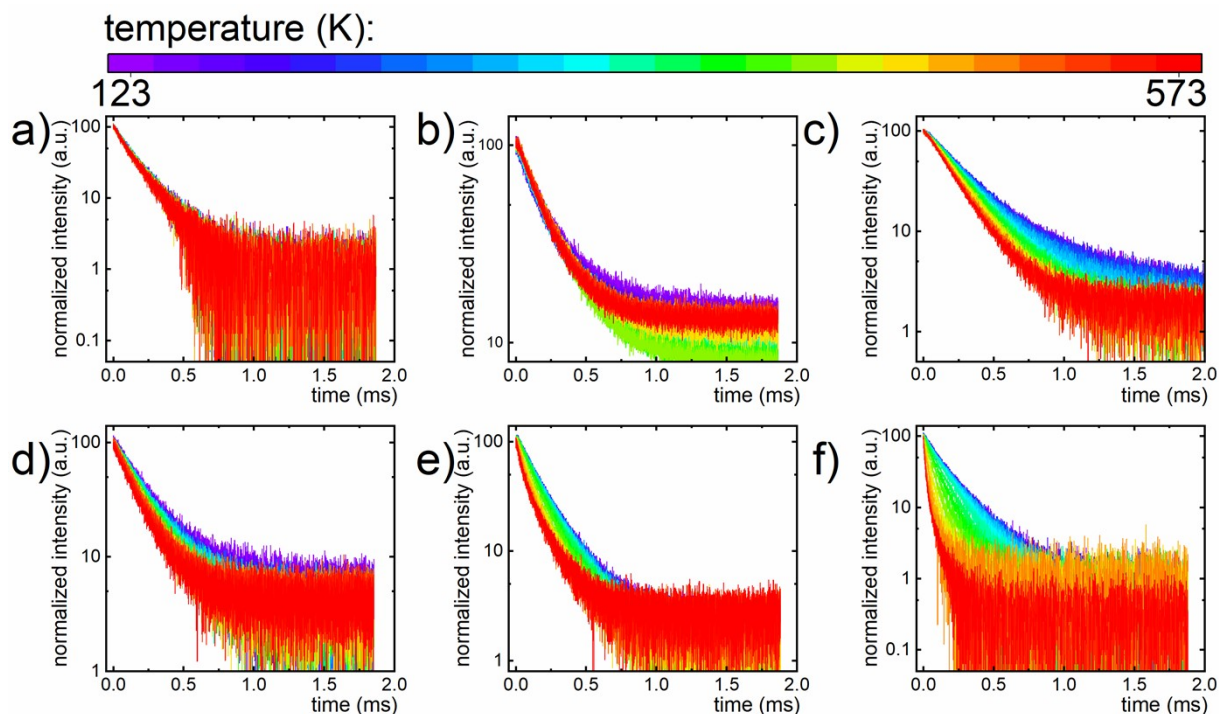

**Figure S9.** The thermal evolution of luminescent decays in YAG:1% Nd<sup>3+</sup>, 1% Er<sup>3+</sup>, x% Cr<sup>3+/4+</sup> for 1064 nm (Nd<sup>3+</sup> excited state), where x = 0 (a), 1 (b), 2 (c), 5 (d), 10 (e), 20 (f).

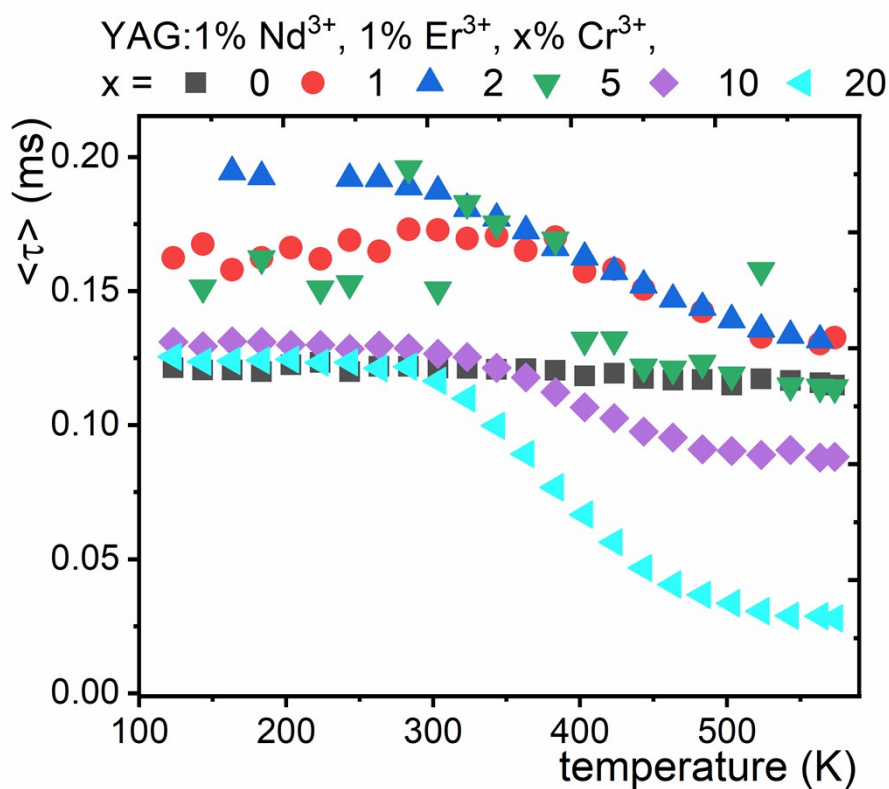

**Figure S10.** The thermal evolution of average lifetime of Nd<sup>3+</sup> excited state for YAG:1% Nd<sup>3+</sup>, 1% Er<sup>3+</sup>, x% Cr<sup>3+/4+</sup> powders.

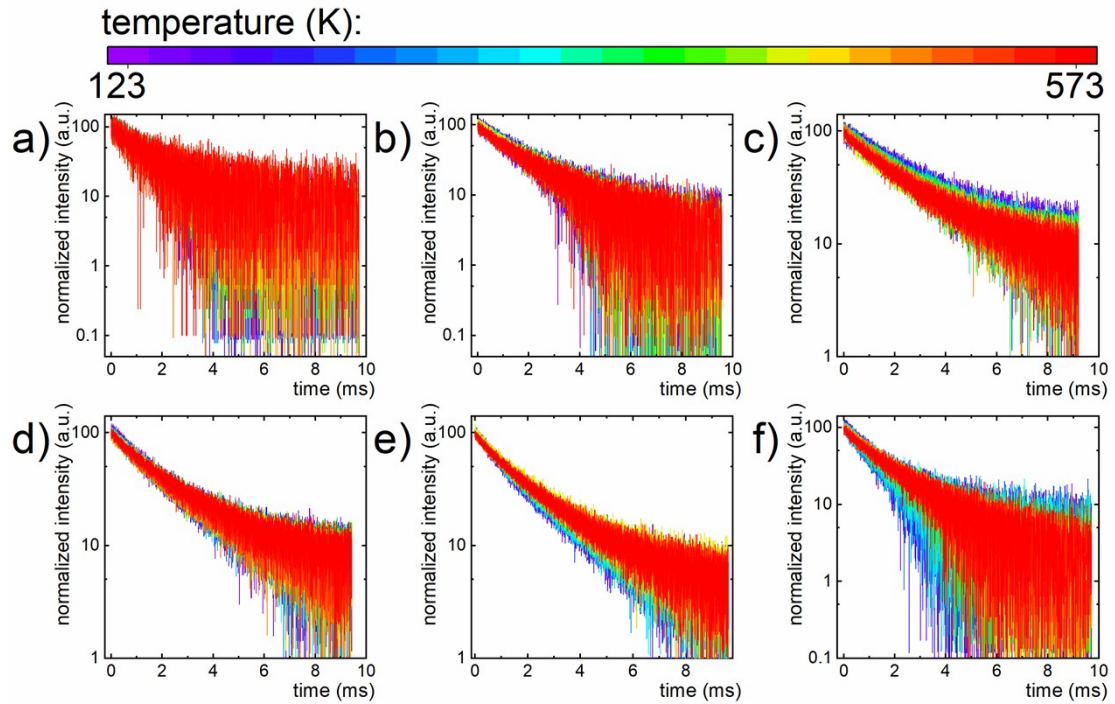

**Figure S11.** The thermal evolution of luminescent decays in YAG:1% Nd<sup>3+</sup>, 1% Er<sup>3+</sup>, x% Cr<sup>3+/4+</sup> for 1530 nm (Er<sup>3+</sup> excited state), where x = 0 (a), 1 (b), 2 (c), 5 (d), 10 (e), 20 (f).

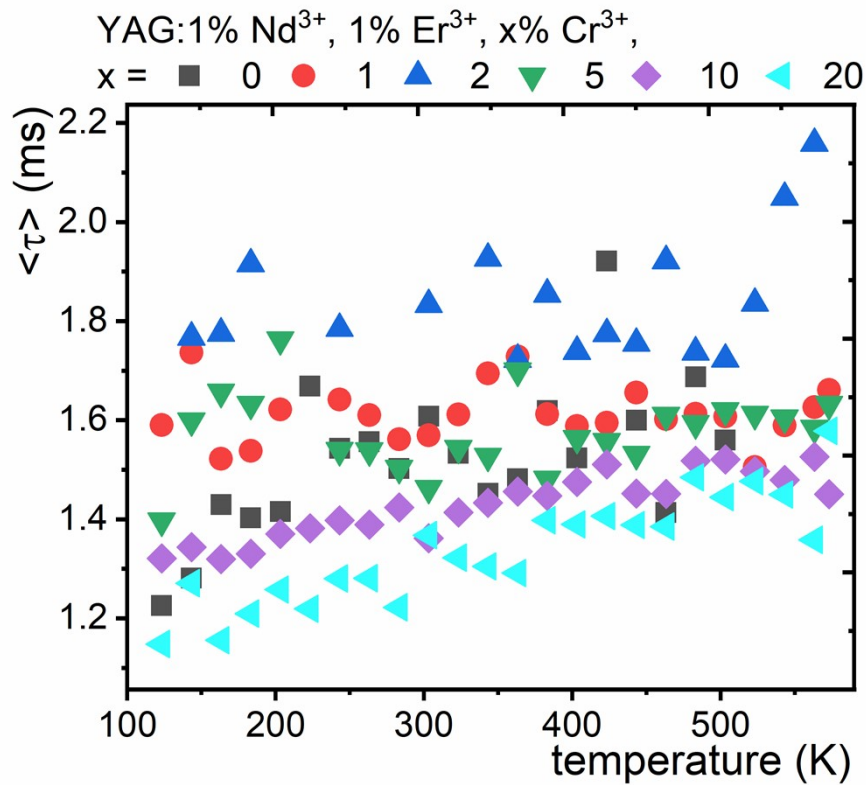

**Figure S12.** The thermal evolution of average lifetime of Er<sup>3+</sup> excited state for YAG:1% Nd<sup>3+</sup>, 1% Er<sup>3+</sup>, x% Cr<sup>3+/4+</sup> powders.

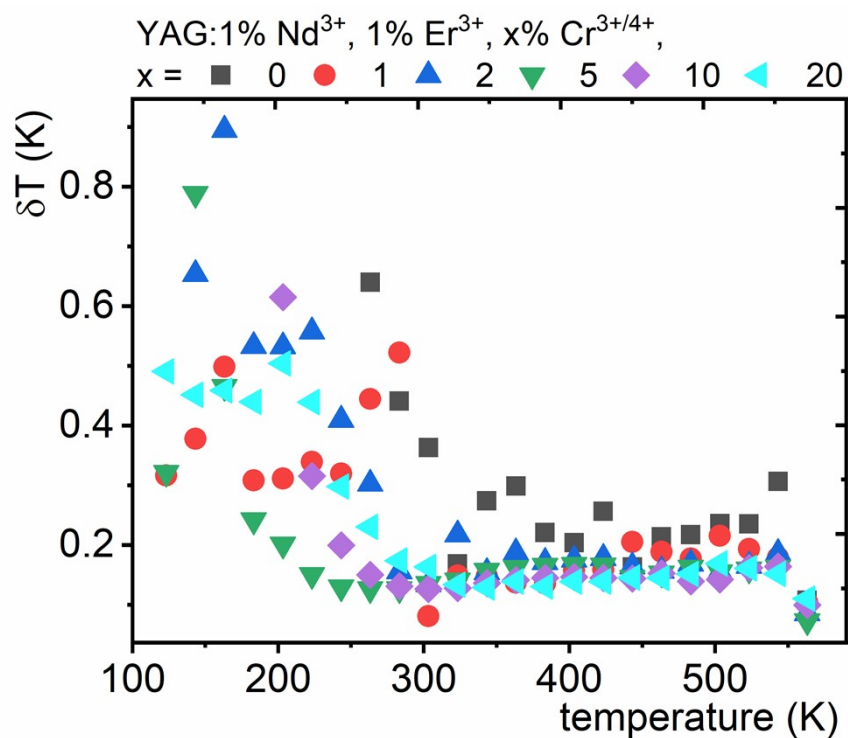

**Figure S13.** The thermal dependence of temperature estimation uncertainty for different Cr<sup>3+/4+</sup> concentration in the YAG:1% Nd<sup>3+</sup>, 1% Er<sup>3+</sup>, x% Cr<sup>3+/4+</sup>.

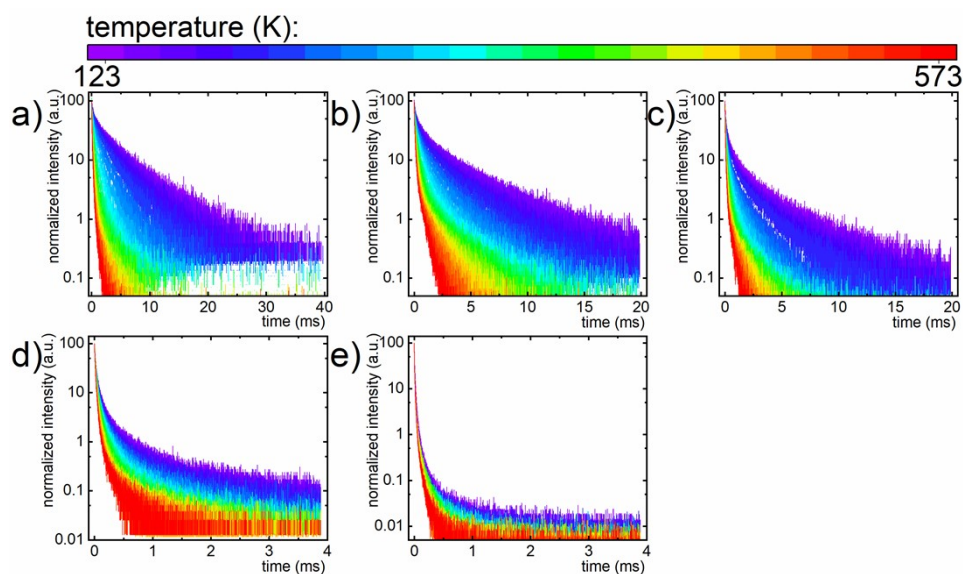

**Figure S14.** The thermal evolution of luminescent decays in YAG:1% Nd<sup>3+</sup>, 1% Er<sup>3+</sup>, x% Cr<sup>3+/4+</sup> for 445 nm (Cr<sup>3+</sup> excited state), where x = 1 (a), 2 (b), 5 (c), 10 (d), 20 (e).

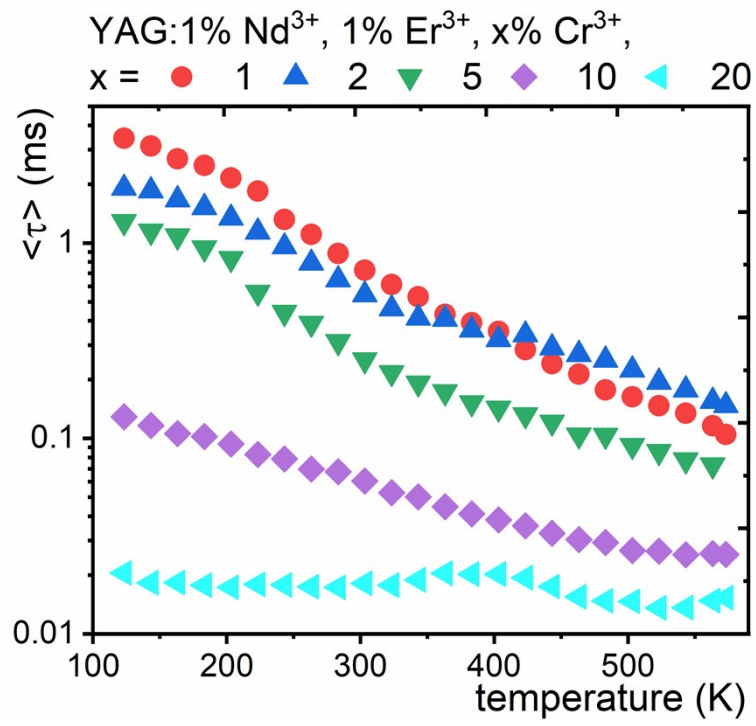

**Figure S15.** The thermal evolution of average lifetime of Cr<sup>3+</sup> excited state for YAG:1% Nd<sup>3+</sup>, 1% Er<sup>3+</sup>, x% Cr<sup>3+/4+</sup> powders.
